# Supplementary material
Source: PubMed Central journal article supplement (PMC10740391)
Supplement: NIHMS1913999-supplement-Supplementary_Figures.pdf [file NIHMS1913999-supplement-Supplementary_Figures.pdf]

## **Apolipoprotein E2 Stimulates Protein Synthesis and Promotes Melanoma Progression**

Nneoma Adaku<sup>1</sup>, Benjamin N. Ostendorf<sup>1</sup>, Wenbin Mei<sup>1</sup>, Sohail F. Tavazoie<sup>1,2</sup>

<sup>1</sup>Laboratory of Systems Cancer Biology, The Rockefeller University, New York, NY 10065, USA

<sup>2</sup>Department of Medicine, Memorial Sloan Kettering Cancer Center, New York, NY 10065, USA

**Supplementary Figures S1-S5**

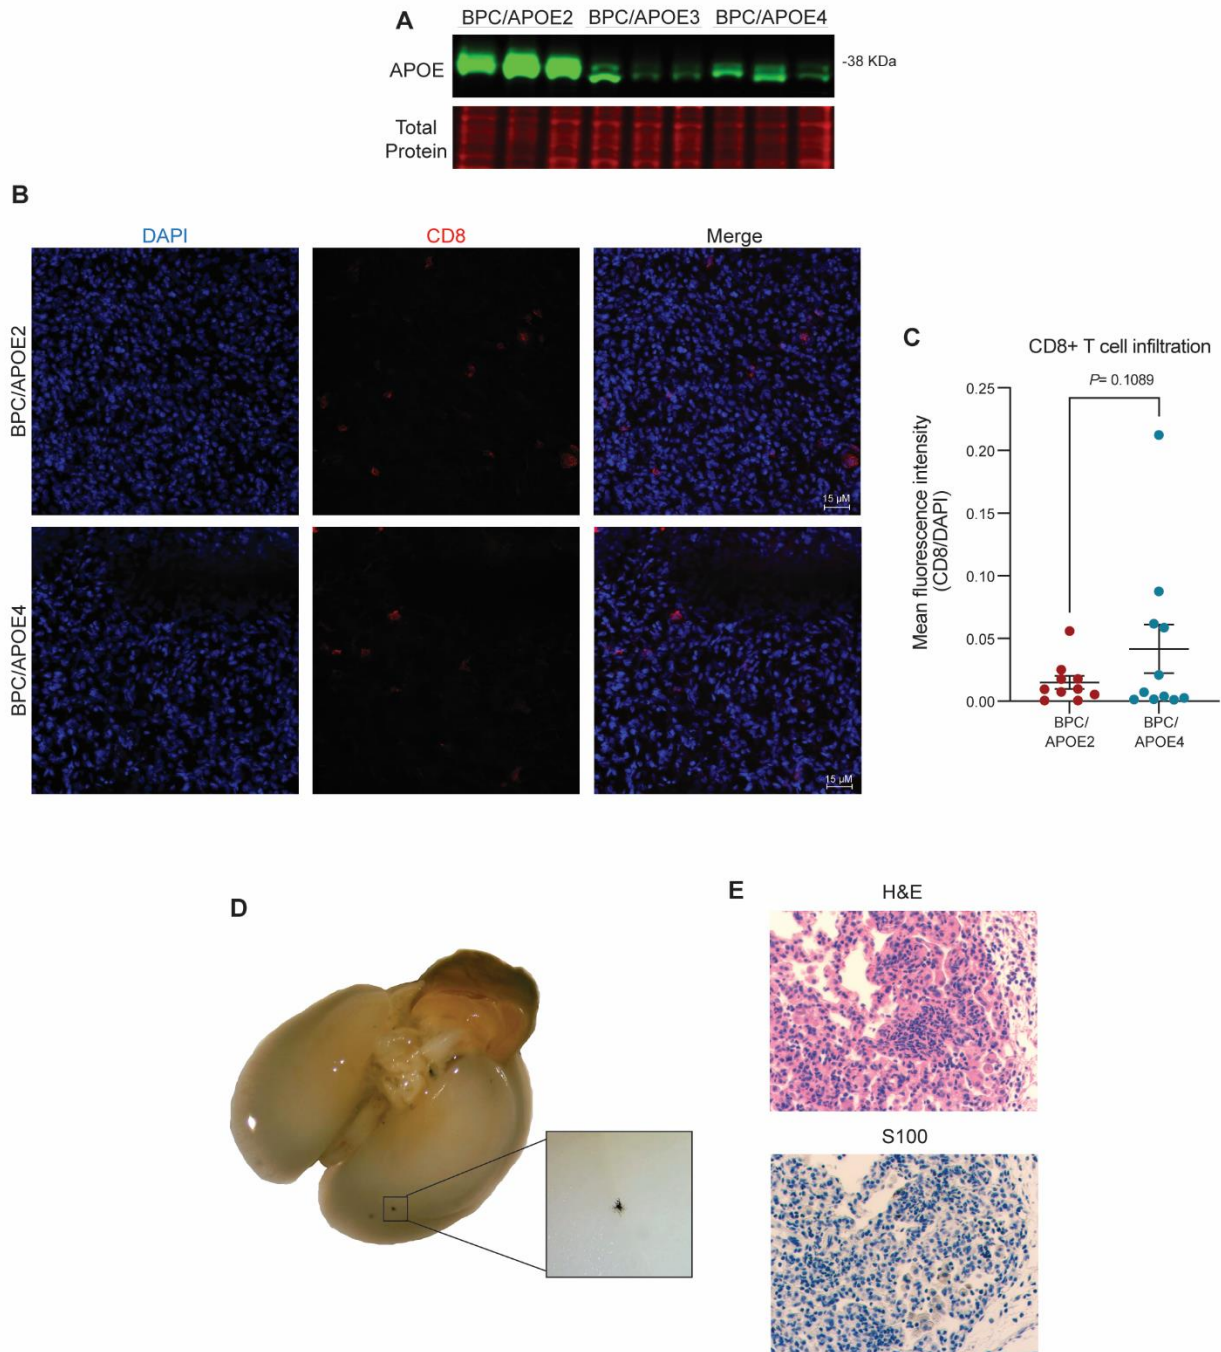

### Supplementary Figure 1. Characterization of *APOE* allelic GEMM

**A**, Western blot of APOE expression in BPC/APOE2, BPC/APOE3, and BPC/APOE4 tumors (n=3 per group). **B**, Representative immunofluorescence images of CD8 and DAPI nuclear staining in BPC/APOE2 and BPC/APOE4 primary tumors (scale bar = 15  $\mu$ m). **C**, Quantification of CD8+ T cell infiltration into BPC/APOE2 (n=10) and BPC/APOE4 (n=11) tumors at the day 49 endpoint, normalized to DAPI. Unpaired t-test. **D**, Representative high-

magnification image of a pigmented lung metastasis after neonatal tumor induction. **E**, Representative H&E (top) and S100 (bottom) staining of a lung metastatic focus after neonatal tumor induction.

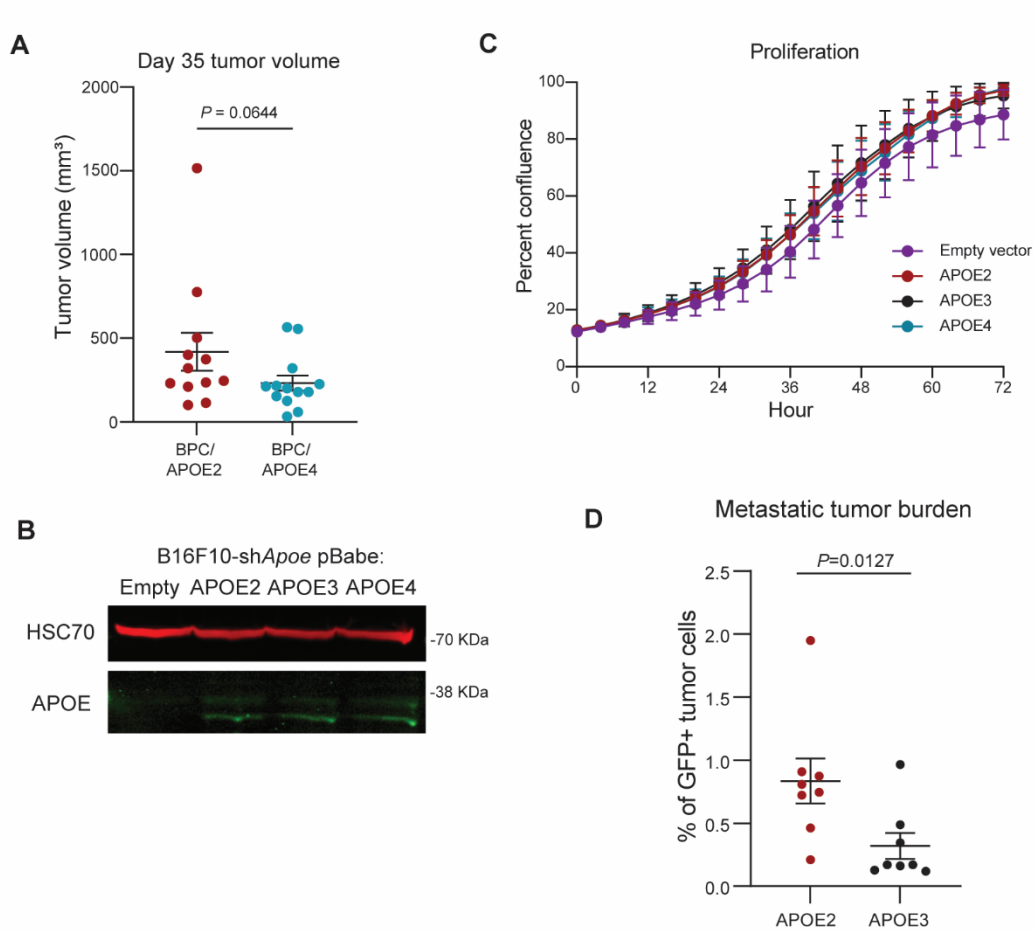

### Supplementary Figure 2. *APOE2* genotype promotes translation in melanoma

**A**, Tumor volumes of BPC/APOE2 (n=12) and BPC/APOE4 (n=13) mice 35 days after 4-OHT administration. Unpaired t-test. **B**, Western blot of APOE expression in B16F10-shApoe cells transduced with pBabe Empty, APOE2, APOE3, or APOE4 retrovirus. HSC70 served as a loading control. **C**, Proliferation under normal growth conditions of B16F10-shApoe cells transduced with pBabe Empty, APOE2, APOE3, or APOE4 retrovirus (n=3 independent experiments). **D**, Abundance of GFP<sup>+</sup> B16F10 tumor cells present in the total cell population derived from dissociated lung tissue of *APOE2* (n=8) and *APOE3* (n=8) knock-in mice (unpaired t-test).

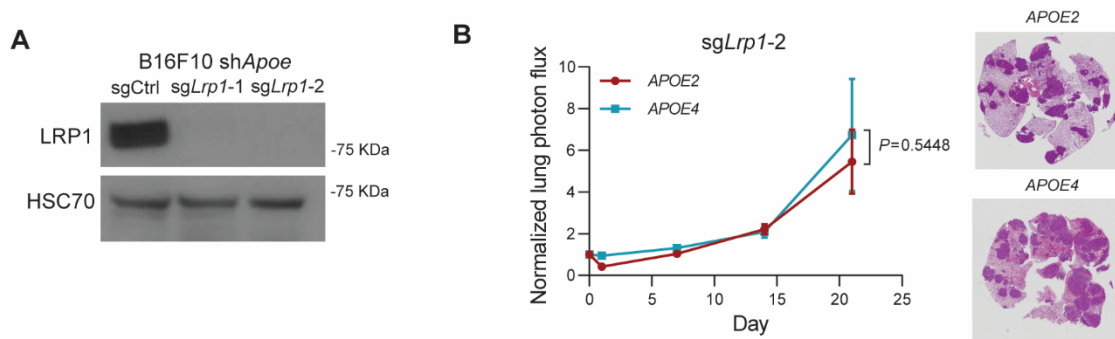

**Supplementary Figure 3. Tumoral *Lrp1* deletion abrogates *APOE* genotype-dependent differences in metastatic colonization**

**A**, Western blot of LRP1 expression in B16F10-TR-shApoe cells transfected with a non-targeting control CRISPR single guide RNA (sgRNA) or two independent *Lrp1*-targeting sgRNAs. HSC70 served as a loading control. **B**, Quantification of lung metastatic progression via bioluminescence imaging of B16F10-TR-shApoe sgLrp1-2 cells injected via lateral tail vein into *APOE2* and *APOE4* mice. Representative images of H&E-stained lungs taken from mice at the day 21 endpoint (n =8-10 mice per group; representative of two independent experiments; two-way ANOVA).

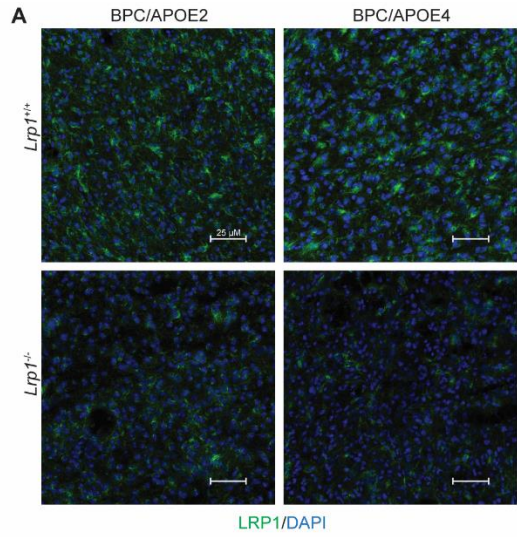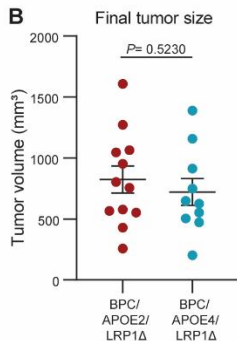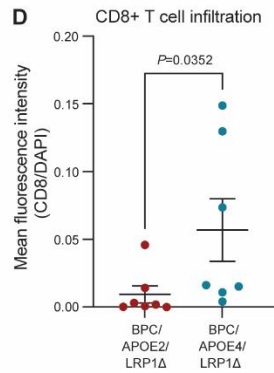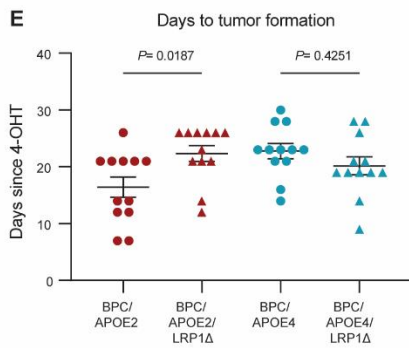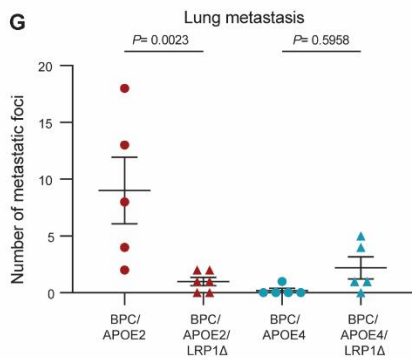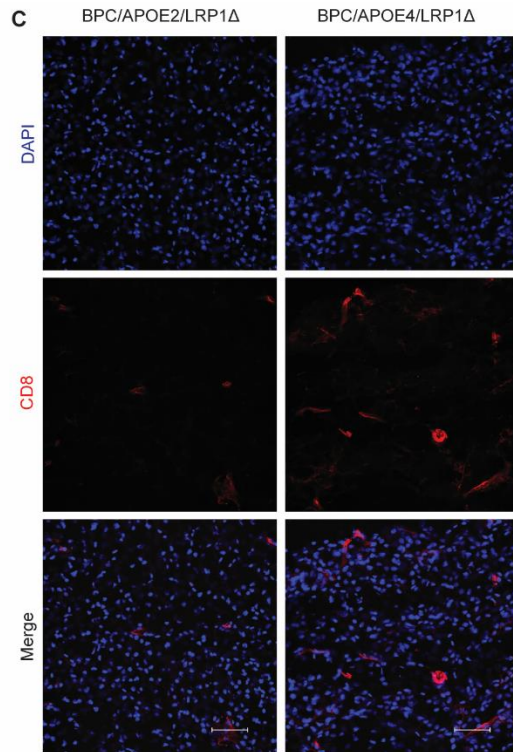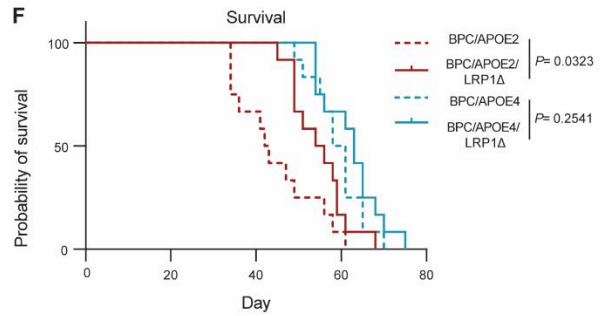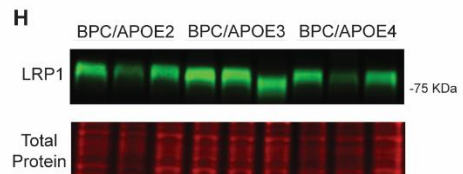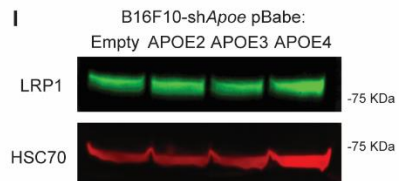

**Supplementary Figure 4. Tumoral LRP1 is a mediator of germline *APOE* variant differences in cancer progression and survival in a genetically initiated model of melanoma**

**A**, Representative immunofluorescence images of LRP1 expression and DAPI nuclear staining in BPC/APOE2, BPC/APOE4, BPC/APOE2/LRP1 $\Delta$ , and BPC/APOE4/LRP1 $\Delta$  primary tumors (scale bar = 25  $\mu$ m). **B**, Final tumor volumes of BPC/APOE2/LRP1 $\Delta$  (n=12) and BPC/APOE4/LRP1 $\Delta$  (n=10) mice at the experimental endpoint 49 days after topical 4-OHT administration. Unpaired t-test. **C**, Representative immunofluorescence images of CD8 and DAPI nuclear staining in BPC/APOE2/LRP1 $\Delta$  and BPC/APOE4/LRP1 $\Delta$  primary tumors (scale bar = 25  $\mu$ m). **D**, Quantification of CD8<sup>+</sup> T cell infiltration into BPC/APOE2/LRP1 $\Delta$  and BPC/APOE4/LRP1 $\Delta$  tumors at the survival endpoint, normalized to DAPI (n=7 per group, unpaired t-test). **E**, Aggregated results from **Figs. 1C** and **3C** of number of days after topical 4-OHT administration until visible, palpable tumors were detected in BPC/APOE2, BPC/APOE2/LRP1 $\Delta$ , BPC/APOE4, and BPC/APOE4/LRP1 $\Delta$  mice (n=12 per group). One-way ANOVA. **F**, Aggregated Kaplan-Meier survival curves from **Figs. 1D** and **3E** of BPC/APOE2, BPC/APOE2/LRP1 $\Delta$ , BPC/APOE4, and BPC/APOE4/LRP1 $\Delta$  mice after topical 4-OHT administration (n=12 per group). Log-rank test. **G**, Aggregated results from **Figs. 1G** and **3F** of lung metastatic foci in BPC/APOE2 (n=5), BPC/APOE2/LRP1 $\Delta$  (n=6), BPC/APOE4 (n=5), and BPC/APOE4/LRP1 $\Delta$  (n=5) mice after neonatal tumor induction. One-way ANOVA. **H**, Western blot of LRP1 expression in BPC/APOE2, BPC/APOE3, and BPC/APOE4 tumors (n=3 per group). **I**, Western blot of LRP1 expression in B16F10-sh*ApoE* cells transduced with pBabe Empty, APOE2, APOE3, or APOE4 retrovirus. HSC70 served as a loading control.

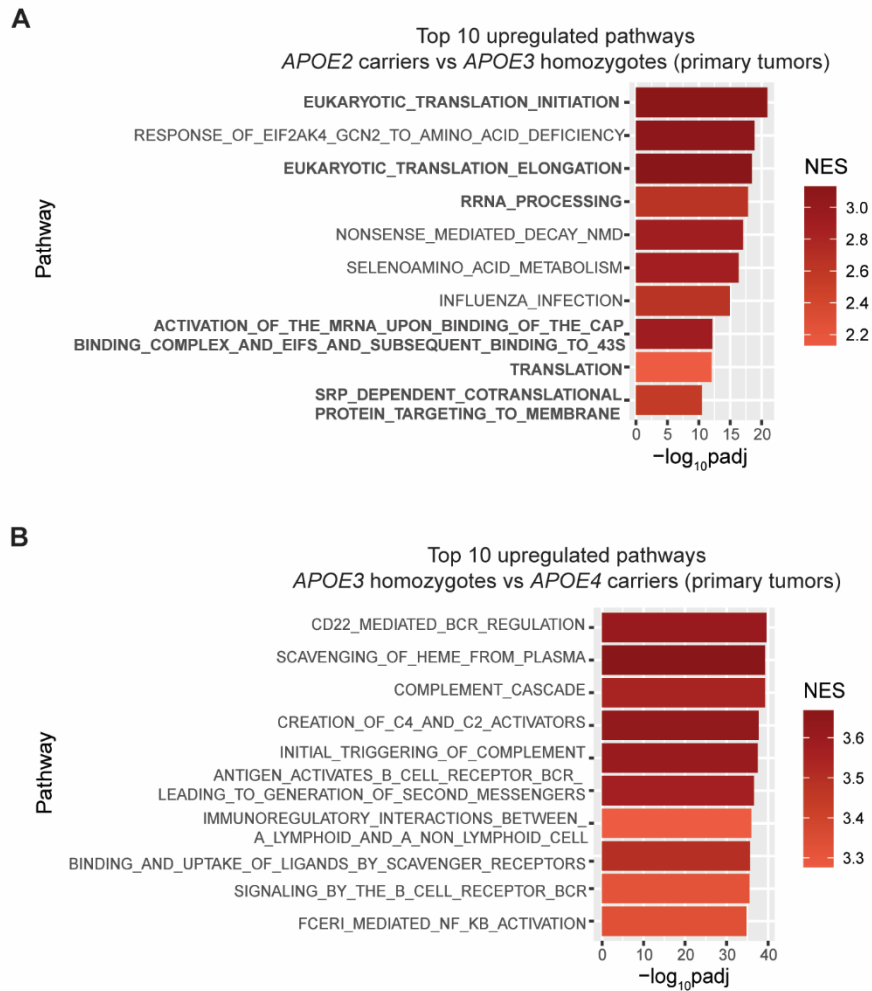

**Supplementary Figure 5. *APOE2* genotype associates with enrichment of mRNA translation gene expression pathways in human melanoma**

**A**, Top ten pathways upregulated in primary tumors of *APOE2* carrier patients (n=14) relative to *APOE3* homozygotes (n=65) as determined by GSEA and ranked by adjusted p-value (NES, normalized enrichment score; padj, adjusted p-value). **B**, Top ten pathways upregulated in primary tumors of *APOE3* homozygotes (n=65) relative to *APOE4* carrier patients (n=19) as determined by GSEA and ranked by adjusted p-value.
